# Supplementary material for: Optogenetic control shows that kinetic proofreading regulates the activity of the T cell receptor
Source: eLife. 2019 Apr 5;8:e42475. doi: 10.7554/eLife.42475 (PMC6488296; doi:10.7554/eLife.42475)
Supplement: Figure 6—source data 1. [file elife-42475-fig6-data1.xlsx]

## Sheet: Calcium
intensity	2 nM	2 nM	6.3 nM	6.3 nM	20 nM	20 nM	63 nM	63 nM	200 nM	200 nM
0	0.0108	0.0141	0.0411	0.04	0.0401	0.0348	0.0521	0.0602	0.0269	0.027
2	0.0085	0.0139	0.0321	0.0286	0.0302	0.0307	0.0466	0.0499	0.0191	0.0277
4	0.0023	0.0053	0.009	0.0063	0.0084	0.0072	0.0255	0.0231	0.0066	0.0196
8	0.0016	0.0036	0.01	0.0038	0.0032	0.0016	0.0099	0.0061	0.0055	0.0111
16	0.0021	0.0026	0.011	0.0027	0.0022	0.0019	0.0053	0.0047	0.003	0.0054
32	0.0021	0.0035	0.0051	0.0027	0.0024	-0.0004	0.0046	0.0044	0.0028	0.0046
0 (20 nM control)	0.033	0.0478	0.0402	0.0509	0.0401	0.0348	0.0486	0.0491	0.0491	0.0358
