# Supplementary material for: Optogenetic control shows that kinetic proofreading regulates the activity of the T cell receptor
Source: eLife. 2019 Apr 5;8:e42475. doi: 10.7554/eLife.42475 (PMC6488296; doi:10.7554/eLife.42475)
Supplement: Figure 7—figure supplement 4—source data 1. [file elife-42475-fig7-figsupp4-data1.xlsx]

## Sheet: Binding
intensity	2 nM	2 nM	2 nM	2 nM	2 nM	2 nM	2 nM	2 nM	2 nM	6.3 nM	6.3 nM	6.3 nM	6.3 nM	6.3 nM	6.3 nM	6.3 nM	6.3 nM	6.3 nM	20 nM	20 nM	20 nM	20 nM	20 nM	20 nM	20 nM	20 nM	63 nM	63 nM	63 nM	63 nM	63 nM	63 nM	63 nM	63 nM	63 nM	200 nM	200 nM	200 nM	200 nM	200 nM	200 nM
0	234		42	148.333	49.3333	51.3333	83.3333	132.333	116.333	110.667	59.6667	84.6667	356.333	319.333	264.333	111.333	130.333	162.333	532	206	260.667	158.667	172.667	114.333	219.333	176.333	528.333	572.333	652.333	170.667	411.667	398.667	297.333	413.333	355.333	410	300	260	417.667	564.667	541.667
2	149	53	30	141.333	54.3333	33.3333	95.3333	140.333	109.333	83.6667	65.6667	44.6667	359.333	291.333	332.333	118.333	132.333	165.333	401	262	187.667	152.667	85.6667	193.333	189.333	140.333	400.333	637.333	554.333	366.667	419.667	213.667	274.333	330.333	455.333	580	401	320	308.667	547.667	700.667
4	111	-154	-18	90.3333	18.3333	21.3333	47.3333	88.3333	50.3333	56.6667	30.6667	22.6667	207.333	188.333	137.333	114.333	84.3333	89.3333	204	162	172.667	69.6667	94.6667	170.333	160.333	127.333	307.333	377.333	318.333	100.667	170.667	6.66667	156.333	167.333	139.333	237	450	253	254.667	428.667	401.667
8	55	-5	-28	61.3333	11.3333	6.33333	16.3333	43.3333	25.3333	-0.333344	12.6667	9.66666	100.333	93.3333	43.3333	40.3333	61.3333	37.3333	113	63	90.6667	57.6667	-7.33333	101.333	87.3333	57.3333	175.333	325.333	300.333	-89.3333	-12.3333	-114.333	99.3333	131.333	68.3333	126	276	245	108.667	323.667	230.667
16	37	10	-32	30.3333	16.3333	4.33333	-7.66667	13.3333	-11.6667	-4.33334	14.6667	-4.33334	66.3333	51.3333	19.3333	21.3333	36.3333	31.3333	21	61	94.6667	73.6667	-30.3333	67.3333	82.3333	68.3333	351.333	325.333	145.333	-48.3333	-43.3333	196.667	112.333	76.3333	71.3333	264	436	103	113.667	134.667	179.667
32	19	3	-45	12.3333	-5.66667	-4.66667	-36.6667	12.3333	-19.6667	-3.33334	-7.33334	-15.3333	19.3333	19.3333	-25.6667	-10.6667	17.3333	1.33333	-29	23	53.6667	88.6667	-63.3333	53.3333	55.3333	55.3333	113.333	119.333	122.333	-155.333	-132.333	144.667	58.3333	27.3333	134.333	237	208	120	188.667	121.667	108.667
