# Supplementary material for: Optogenetic control shows that kinetic proofreading regulates the activity of the T cell receptor
Source: eLife. 2019 Apr 5;8:e42475. doi: 10.7554/eLife.42475 (PMC6488296; doi:10.7554/eLife.42475)
Supplement: Figure 8—source data 1. [file elife-42475-fig8-data1.xlsx]

## Sheet: Conversion
Time (s)	6.3 nM 32%	6.3 nM 100%	20 nM 32%	20 nM 100%
0	0.002	0.002	0.0002	0.0008
0.002		0.0016		0.0003
0.006		0.0011		0.0035
0.02	0.001	0.0016	0.0039	0.0027
0.063	0.0021	0.0046	0.0035	0.0077
0.2	0.0063	0.0081	0.0069	0.0131
0.63	0.008		0.0129
2	0.0098		0.0158
PhyBt(660)	0.0123	0.0096	0.0146	0.0202
