# Supplementary figures and images for: Optogenetic control shows that kinetic proofreading regulates the activity of the T cell receptor
Source: eLife journal article supplement (doi:10.7554/elife.42475), 2019-04-04

**A**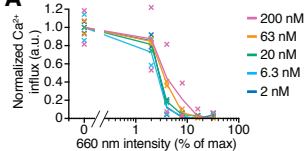**B**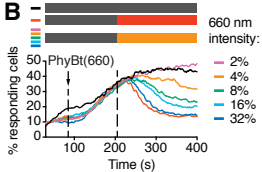**C**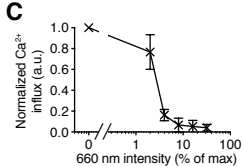

Supplement: supp [file elife-42475-supp-v1.zip]

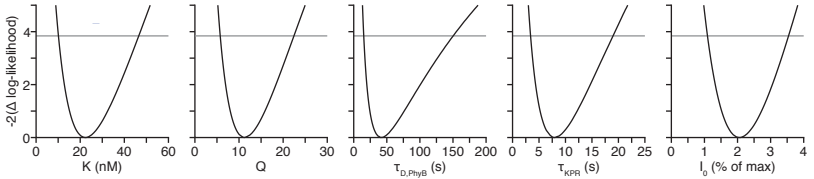

Supplement: supp [file elife-42475-supp-v1.zip]

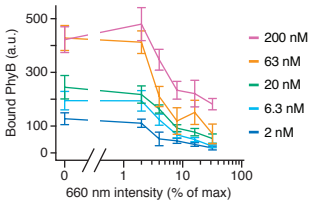

Supplement: supp [file elife-42475-supp-v1.zip]

**A**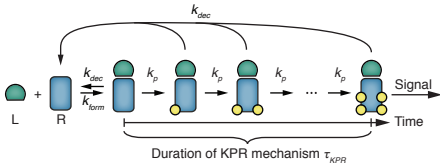**B**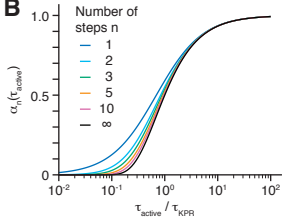

Supplement: supp [file elife-42475-supp-v1.zip]

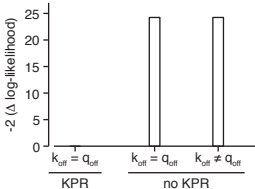

Supplement: supp [file elife-42475-supp-v1.zip]

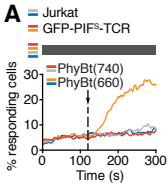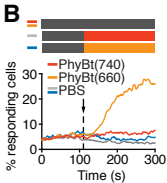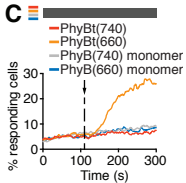

Supplement: supp [file elife-42475-supp-v1.zip]

**A**

conserv.

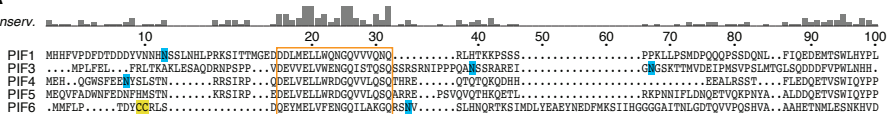**B**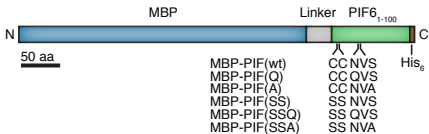**C**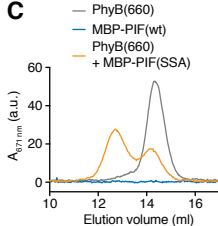**D**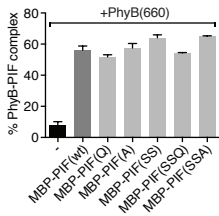

Supplement: supp [file elife-42475-supp-v1.zip]

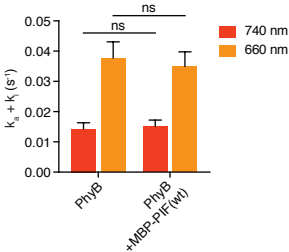

Supplement: supp [file elife-42475-supp-v1.zip]
